# Supplementary material for: A Non-Targeted Capillary Electrophoresis-Mass Spectrometry Strategy to Study Metabolic Differences in an In Vitro Model of High-Glucose Induced Changes in Human Proximal Tubular HK-2 Cells
Source: PubMed Central journal article supplement (PMC7037647; doi:10.3390/molecules25030512), 2020-01-24
Supplement: molecules-25-00512-s001.pdf [file molecules-25-00512-s001.pdf]

Supplementary information

**A Non-Targeted Capillary Electrophoresis-Mass Spectrometry Strategy to Study Metabolic Differences in an *In Vitro* Model of High-Glucose Induced Changes in Human Proximal Tubular HK-2 Cells**

Samuel Bernardo-Bermejo<sup>1</sup>, Elena Sánchez-López<sup>1</sup>, María Castro-Puyana<sup>1,2</sup>, Selma Benito-Martínez<sup>3,4</sup>, Francisco Javier Lucio-Cazaña<sup>3</sup>, María Luisa Marina<sup>1,2,\*</sup>

<sup>1</sup> Departamento de Química Analítica, Química Física e Ingeniería Química, Universidad de Alcalá Ctra. Madrid-Barcelona Km. 33.600, 28871 Alcalá de Henares (Madrid), Spain.

<sup>2</sup> Instituto de Investigación Química Andrés M. del Río (IQAR), Universidad de Alcalá Ctra. Madrid-Barcelona Km. 33.600, 28871 Alcalá de Henares (Madrid), Spain.

<sup>3</sup> Departamento de Biología de Sistemas, Universidad de Alcalá Ctra. Madrid-Barcelona Km. 33.600, 28871 Alcalá de Henares (Madrid), Spain.

<sup>4</sup> Ramón y Cajal Health Research Institute (IRYCIS), Madrid, Spain.

**\*Correspondence:** Departamento de Química Analítica, Química Física e Ingeniería Química, Universidad de Alcalá Ctra. Madrid-Barcelona, Km. 33.600, 28871 Alcalá de Henares, Madrid, España.

**E-mail:** mluisa.marina@uah.es

**Fax:** +34-91 885 4971

**Tel:** +34-91 885 4935

## Figures

**Figure S1.** Comparison of the sensitivity using different flow rates of sheath liquid. The figure shows the EIC of IS methionine sulfone at different flow rates: marked in red 4  $\mu\text{L}/\text{min}$ , marked in black 6  $\mu\text{L}/\text{min}$  and marked in green 8  $\mu\text{L}/\text{min}$ .

**Figure S2.** Comparison of extraction solvents in the extracellular fluid. The figure shows the TCE using 100% MeOH (marked in red) and 100% ACN (marked in black).

**Figure S3.** PCA normalized with IS tyramine. QC, quality control; NG, normal glucose; HG, high glucose; M, osmotic control.

**Figure S4.** Hierarchical cluster analysis (HCA) of the two analytical sequences: A) HCA of intracellular fluid and B) HCA of extracellular fluid.

**Figure S5.** Box-plots of the two metabolites of the intracellular fluid unequivocally identified.

**Figure S6.** Box-plots of the seven metabolites of the extracellular fluid unequivocally and tentatively identified.

**Figure S7.** Box-plots of the metabolite unequivocally identified in both intra and extracellular fluids.

**Figure S1.**

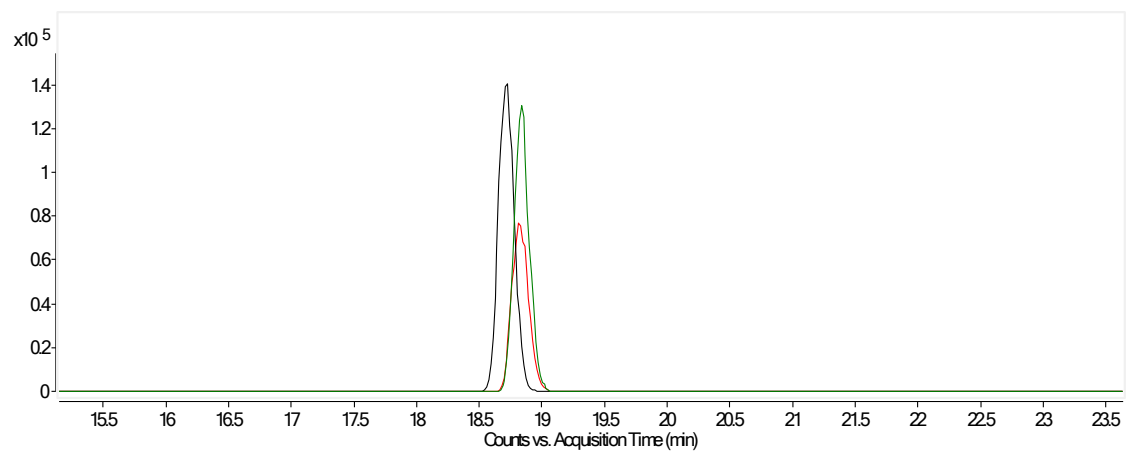

**Figure S2.**

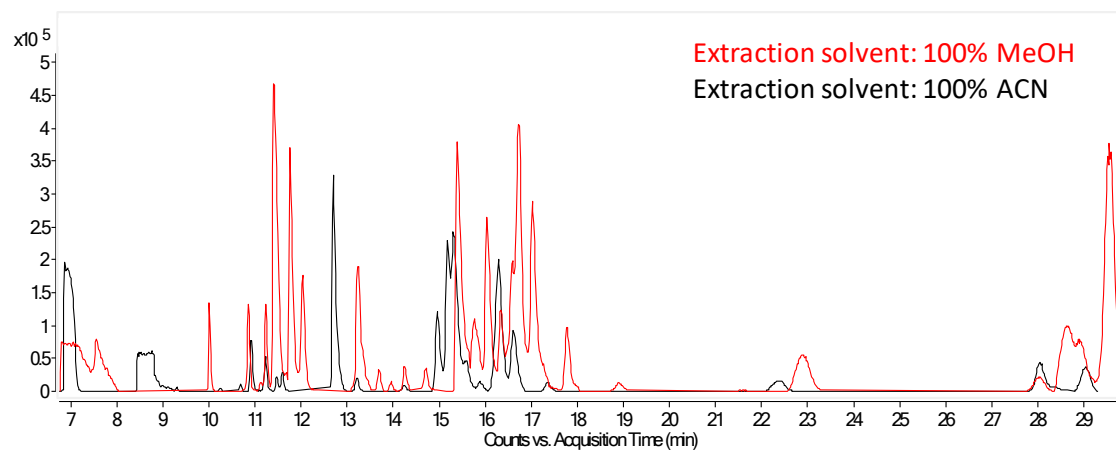



Figure S4.

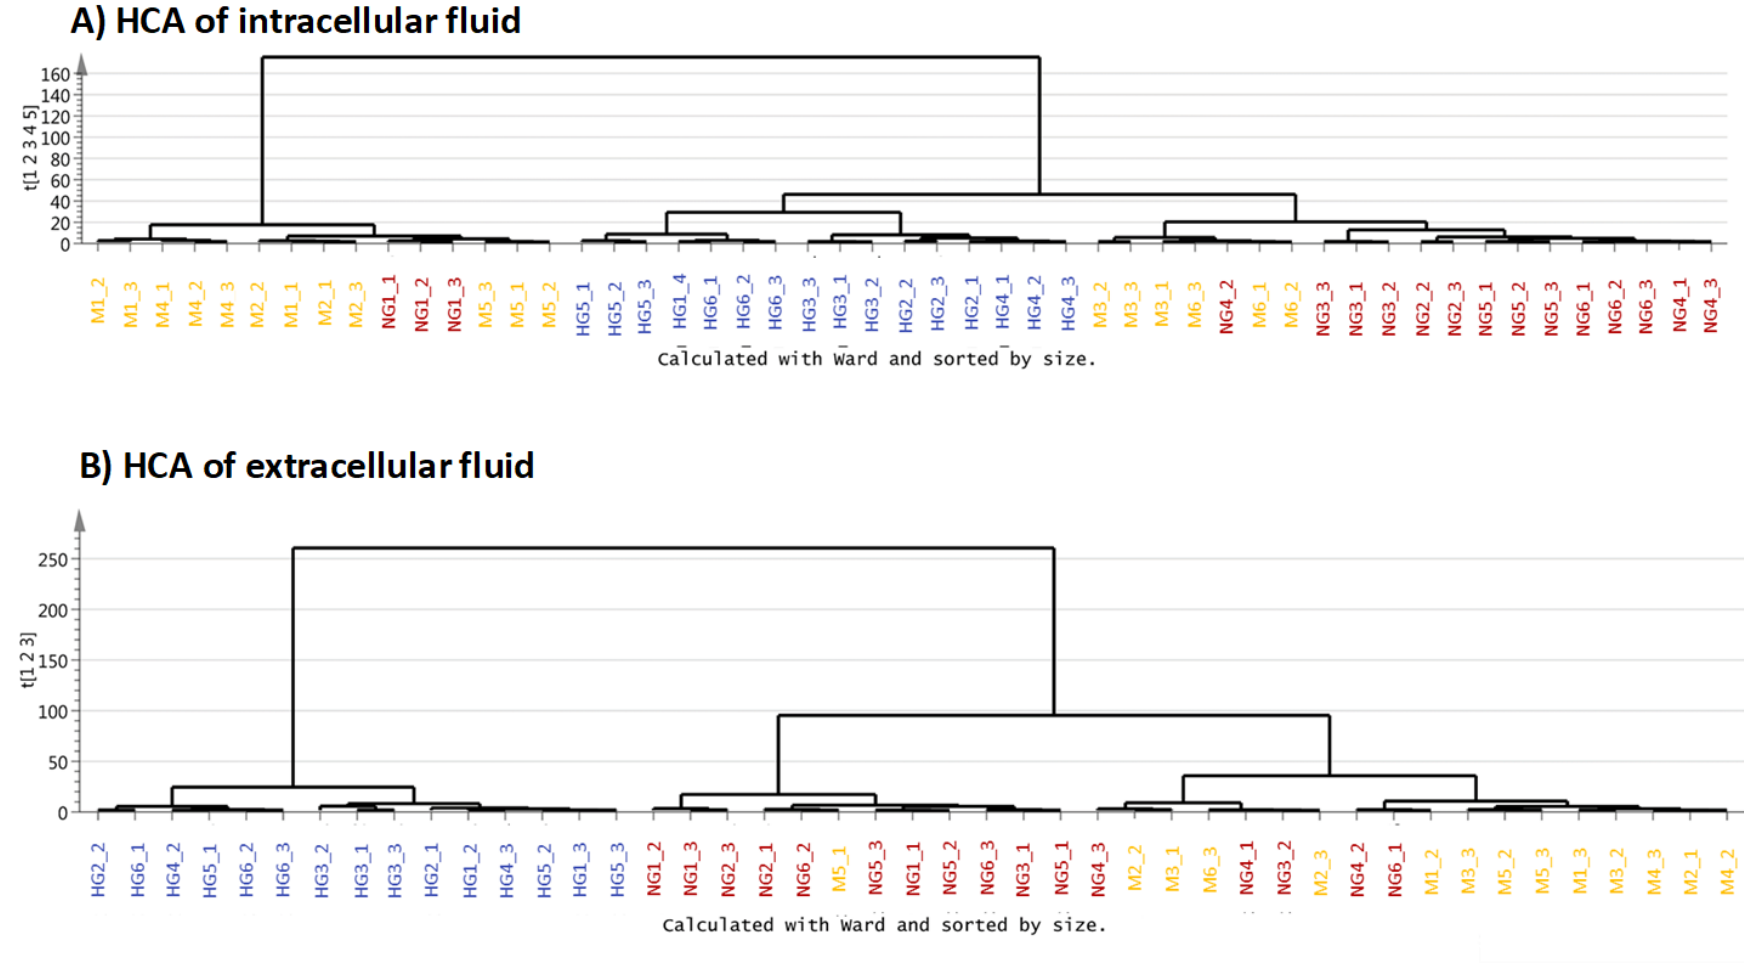

Figure S5.

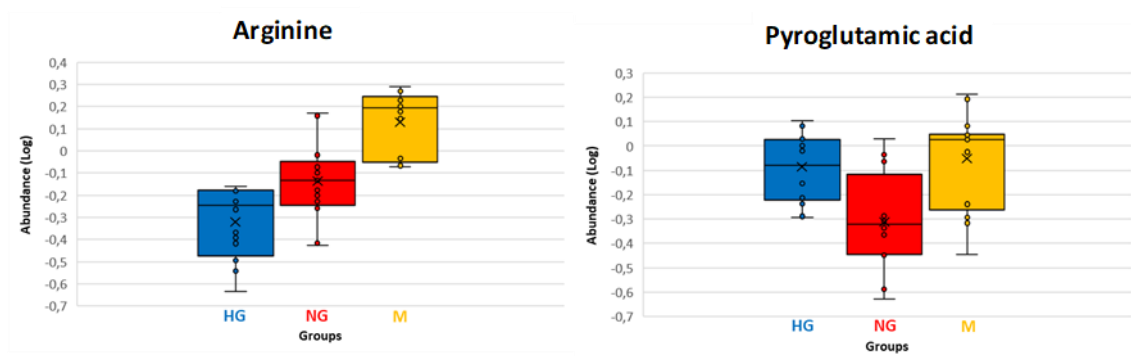

Figure S6.

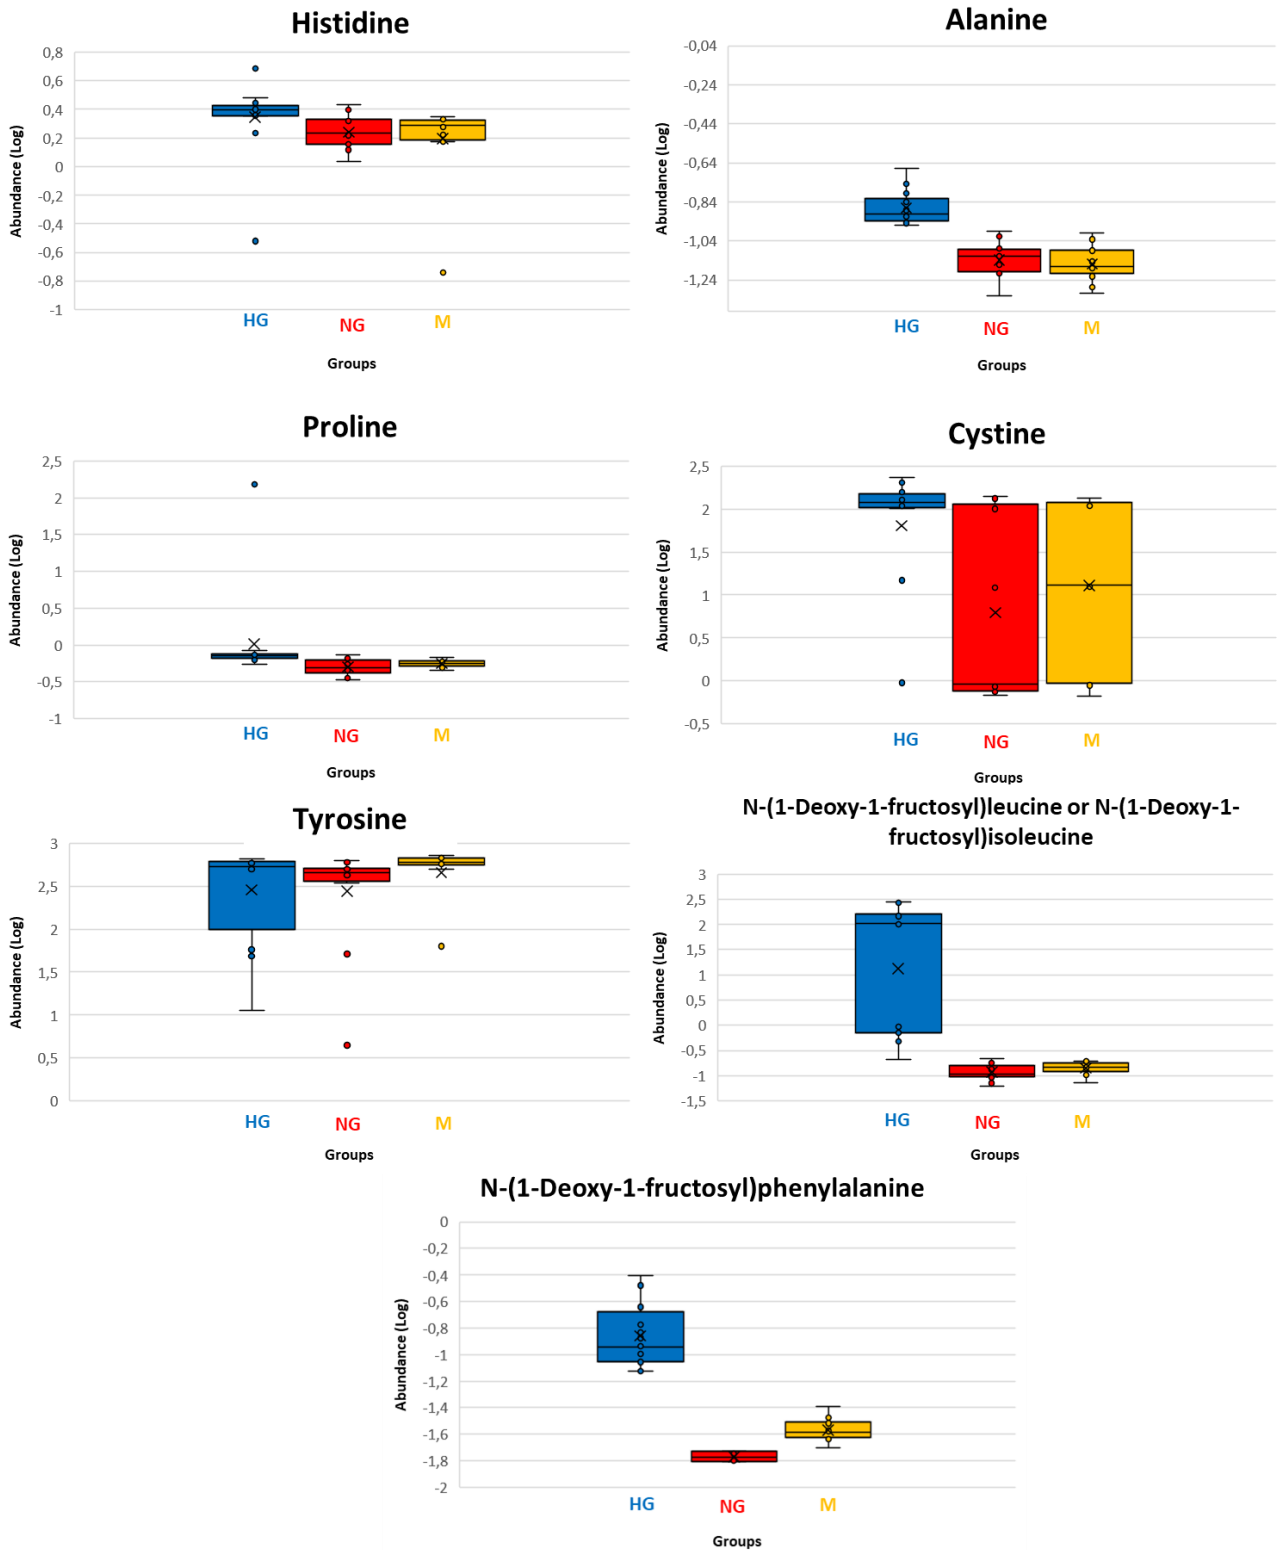



Figure S7.

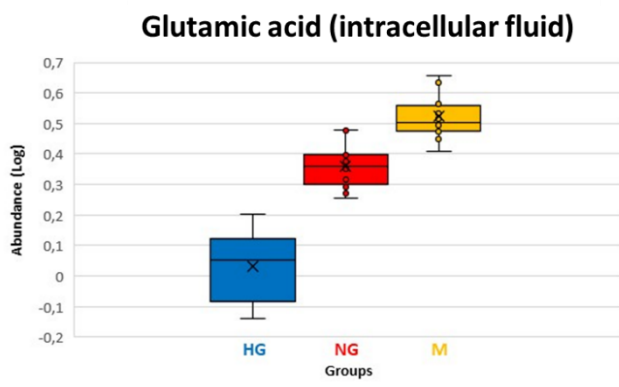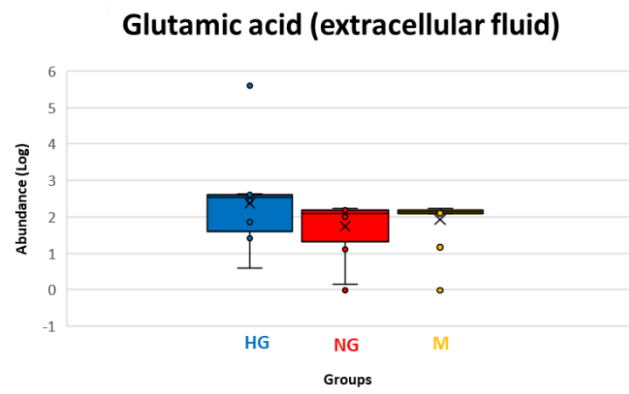

**Table S1.** Unknown molecular features which were statistically significant for any of the two analytical sequences

| #                          | MT (min) | Monoisotopic mass (Da) | Main fragments                         | p-value*              |                        | Trend** |
|----------------------------|----------|------------------------|----------------------------------------|-----------------------|------------------------|---------|
|                            |          |                        |                                        | HG vs NG              | NG vs M                |         |
| <b>Intracellular fluid</b> |          |                        |                                        |                       |                        |         |
| 1                          | 10.9     | 503.2651               | -                                      | $1.61 \times 10^{-2}$ | $1.1 \times 10^{-2}$   | ↓       |
| 2                          | 10.9     | 475.2328               | -                                      | $1.34 \times 10^{-2}$ | $1.73 \times 10^{-4}$  | ↓       |
| 3                          | 13.2     | 299.1356               | 121.0635, 282.1352                     | $2.32 \times 10^{-7}$ | $8.92 \times 10^{-2}$  | ↑       |
| 4                          | 13.5     | 775.4005               | -                                      | $3.88 \times 10^{-2}$ | $1.82 \times 10^{-4}$  | ↓       |
| 5                          | 13.5     | 575.2941               | -                                      | $1.01 \times 10^{-7}$ | $6.93 \times 10^{-8}$  | ↓       |
| 6                          | 13.5     | 547.2623               | -                                      | $1.35 \times 10^{-7}$ | $9.10 \times 10^{-8}$  | ↓       |
| 7                          | 14.5     | 609.2809               | -                                      | $1.08 \times 10^{-3}$ | 0.14                   | ↓       |
| 8                          | 14.5     | 581.2505               | -                                      | $9.39 \times 10^{-4}$ | $2.88 \times 10^{-2}$  | ↓       |
| 9                          | 14.5     | 809.3868               | -                                      | $6.34 \times 10^{-3}$ | 0.61                   | ↓       |
| 10                         | 18.5     | 308.1188               | -                                      | $1.78 \times 10^{-4}$ | $3.94 \times 10^{-4}$  | ↑       |
| <b>Extracellular fluid</b> |          |                        |                                        |                       |                        |         |
| 11                         | 10.3     | 203.9495               | 90.9754, 84.9587                       | $3.38 \times 10^{-2}$ | $1.55 \times 10^{-2}$  | ↑       |
| 12                         | 11.9     | 262.1397               | 246.1212, 221.1233, 204.0974           | $5.56 \times 10^{-6}$ | 0.34                   | ↓       |
| 13                         | 12.9     | 109.0640               | 74.0970, 94.0400                       | $3.22 \times 10^{-3}$ | 0.67                   | ↑       |
| 14                         | 13.0     | 767.3479               | 427.1522, 327.0499, 191.0769           | $2.17 \times 10^{-3}$ | 0.25                   | ↓       |
| 15                         | 13.1     | 712.3085               | 381.2971, 226.9525                     | $8.32 \times 10^{-8}$ | 0.16                   | ↑       |
| 16                         | 13.8     | 774.3469               | 482.2129                               | $1.46 \times 10^{-5}$ | 0.99                   | ↑       |
| 17                         | 15.3     | 308.1535               | 128.0627, 211.0961, 84.0734, 225.1129  | $5.12 \times 10^{-8}$ | 0.14                   | ↑       |
| 18                         | 15.4     | 128.0555               | 84.0790, 121.0623                      | $2.18 \times 10^{-6}$ | 0.63                   | ↓       |
| 19                         | 15.8     | 491.3196               | 226.9489, 90.9748, 158.9617, 381.2956  | $3.51 \times 10^{-4}$ | 0.11                   | ↑       |
| 20                         | 15.8     | 447.3559               | 90.9737, 381.2967                      | $4.25 \times 10^{-6}$ | 0.32                   | ↑       |
| 21                         | 15.8     | 419.3233               | 90.9745, 210.0451, 308.1164            | $1.86 \times 10^{-3}$ | 0.89                   | ↑       |
| 22                         | 16.4     | 308.1582               | 191.0708, 90.9734                      | $4.75 \times 10^{-8}$ | 0.19                   | ↑       |
| 23                         | 16.5     | 573.3849               | 226.9518, 242.9260                     | $6.62 \times 10^{-5}$ | $9.54 \times 10^{-2}$  | ↓       |
| 24                         | 16.5     | 193.0949               | 84.9565, 78.9930                       | $3.06 \times 10^{-4}$ | 0.17                   | ↓       |
| 25                         | 16.6     | 297.0451               | -                                      | $6.16 \times 10^{-5}$ | $6.52 \times 10^{-2}$  | ↑       |
| 26                         | 16.7     | 336.1645               | 90.9740, 158.9606                      | $7.83 \times 10^{-8}$ | $17.50 \times 10^{-2}$ | ↑       |
| 27                         | 17.2     | 266.1380               | 149.0218, 122.0675, 90.9748            | $1.17 \times 10^{-4}$ | 0.33                   | ↓       |
| 28                         | 17.3     | 317.1221               | 143.0272, 202.0770, 176.0629, 164.0239 | $1.07 \times 10^{-2}$ | 0.00                   | ↑       |
| 29                         | 19.2     | 527.3422               | 314.0307, 120.0033, 391.0416, 217.0165 | $2.68 \times 10^{-3}$ | 0.38                   | ↑       |
| 30                         | 20.3     | 133.0373               | -                                      | $9.38 \times 10^{-3}$ | 0.74                   | ↑       |
| 31                         | 23.1     | 220.0826               | -                                      | $5.30 \times 10^{-4}$ | 0.26                   | ↑       |

|    |       |          |                                              |                       |      |   |
|----|-------|----------|----------------------------------------------|-----------------------|------|---|
| 32 | 24.18 | 225.0746 | 78.9956, 106.9899, 90.9746, 116.9731136.0761 | $5.93 \times 10^{-5}$ | 0.34 | ↓ |
| 33 | 24.80 | 279.1324 | 90.9743                                      | $9.60 \times 10^{-3}$ | 0.74 | ↑ |
| 34 | 25.10 | 296.0501 | 176.0593, 120.0036                           | $2.59 \times 10^{-6}$ | 0.37 | ↑ |
| 35 | 26.28 | 343.1268 | 90.9744, 57.0682, 158.9627                   | $1.96 \times 10^{-5}$ | 0.23 | ↑ |
| 36 | 27.26 | 574.1223 | 226.9493, 158.9635                           | $1.14 \times 10^{-4}$ | 0.13 | ↓ |

\*p-value of Mann Whitney U test < FDR cut-off (0.040).

\*\*↑: The metabolite (on average) is more abundant in HG vs NG; ↓: The metabolite (on average) is less abundant in HG vs NG.
